# Supplementary material
Source: Elsevier journal article supplement (https://www.sciencedirect.com/science/article/pii/S1887836922000126)
Supplement: mmc3 [file S1887836922000126:mmc3.pdf]

## **Anexo 3 del material adicional**

### **Referencias de los artículos incluidos en la revisión**

- Aroxa FHD, Gondim ITG, Santos ELW, Coriolano MDG, Asano AGC, Asano NMJ. Acupuncture as Adjuvant Therapy for Sleep Disorders in Parkinson's Disease. *JAMS J Acupunct Meridian Stud.* 2017;10:33-8.
- Chae Y, Lee H, Kim H, et al. Parsing brain activity associated with acupuncture treatment in Parkinson's diseases. *Mov Disord.* 2009;24:1794-802.
- Chen F, Chang C, Shiu J, et al. A clinical study of integrating acupuncture and western medicine in treating patients with Parkinson's disease. *Am J Chin Med.* 2015;43:407-23.
- Cho S, Lee Y, Doo K, et al. Efficacy of Combined Treatment with Acupuncture and Bee Venom Acupuncture as an Adjunctive Treatment for Parkinson's Disease. *J Altern Complement Med.* 2018;24:25-32.
- Cho S, Shim S, Rhee HY, et al. Effectiveness of acupuncture and bee venom acupuncture in idiopathic Parkinson's disease. *Parkinsonism Relat Disord* 2012;18:948-52.
- Cristian A, Katz M, Cutrone E, Walker RH. Evaluation of acupuncture in the treatment of Parkinson's disease: A double-blind pilot study. *Mov Disord.* 2005;20:1185-8.
- Doo K, Lee J, Cho S, et al. A prospective open-label study of combined treatment for idiopathic Parkinson's disease using acupuncture and bee venom acupuncture as an adjunctive treatment. *J Altern Complement Med.* 2015;21:598-603.
- Eng ML, Lyons KE, Greene MS, Pahwa R. Open-label trial regarding the use of acupuncture and Yin Tui Na in Parkinson's disease outpatients: A pilot study on efficacy, tolerability, and quality of life. *J Altern Complement Med.* 2006;12:395-9.
- Fukuda S, Egawa M. Effect of acupuncture on gait in Parkinson's disease: A case report. *Acupunct Med.* 2015;33:325-8.
- Fukuda S, Kuriyama N, Tsuru H, Egawa M. Immediate effects of acupuncture

- on tongue pressure including swallowing reflex latency in Parkinson's disease. *Acupunct Med.* 2016;34:59-61.
- Huang Y, Jiang X, Zhuo Y, Tang A, Wik G. Complementary acupuncture treatment increases cerebral metabolism in patients with Parkinson's disease. *Int J Neurosci.* 2009;119:1190-7.
- Jang J-H, Park S, An J, et al. Gait Disturbance Improvement and Cerebral Cortex Rearrangement by Acupuncture in Parkinson's Disease: A Pilot Assessor-Blinded, Randomized, Controlled, Parallel-Group Trial. *Neurorehabil Neural Repair.* 2020;34:1111-23.
- Kong KH, Ng HL, Li W, et al. Acupuncture in the treatment of fatigue in Parkinson's disease: A pilot, randomized, controlled, study. *Brain Behav.* 2018;8:e00897.
- Lei H, Toosizadeh N, Schwenk M, et al. A pilot clinical trial to objectively assess the efficacy of electroacupuncture on gait in patients with Parkinson's disease using body worn sensors. *PLoS One.* 2016;11:e0155613.
- Ren X. Fifty cases of Parkinson's disease treated by acupuncture combined with madopar. *J Trad Chin Med.* 2008;28:255-7.
- Shulman LM, Wen X, Weiner WJ, et al. Acupuncture therapy for the symptoms of Parkinson's disease. *Mov Disord.* 2002;17:799-802.
- Toosizadeh N, Lei H, Schwenk M, et al. Does integrative medicine enhance balance in aging adults? Proof of concept for the benefit of electroacupuncture therapy in Parkinson's disease. *Gerontology.* 2014;61:3-14.
- Werth U, Muñoz Gaona A. Comparative study of the efficacy of the usual therapy for Parkinson's disease plus auricular acupuncture and the usual therapy without acupuncture. *Rev Int Acupunt.* 2018;12:5-14.
- Xu Y, Cai X, Qu S, et al. Madopar combined with acupuncture improves motor and non-motor symptoms in Parkinson's disease patients: A multicenter randomized controlled trial. *European Journal of Integrative Medicine.* 2020;34:101049.
- Yeo S, Choe I, Van den Noort M, et al. Acupuncture on GB34 activates the precentral gyrus and prefrontal cortex in Parkinson's disease. *BMC*

Complement Altern Med. 2014;14:336.

Yeo S, Lim S, Choe I, et al. Acupuncture stimulation on gb34 activates neural responses associated with Parkinson's disease. *CNS Neurosci Ther.* 2012;18:781-90.

Yeo S, Van den Noort M, Bosch P, Lim S. A study of the effects of 8-week acupuncture treatment on patients with Parkinson's disease. *Medicine (Baltimore).* 2018;97:e13434.
